# Supplementary material for: Sound Vibration-Triggered Epigenetic Modulation Induces Plant Root Immunity Against Ralstonia solanacearum
Source: Front Microbiol. 2020 Aug 21;11:1978. doi: 10.3389/fmicb.2020.01978 (PMC7472266; doi:10.3389/fmicb.2020.01978)
Supplement: TABLE S5 — Differentially expressed (DE) miRNAs identified between 10 kHz-treated and control plants. [file Table_5.XLSX]

## Sheet: 1. Day 0_10 kHZ (Down)
Category	Term	Count	%	PValue	Genes	List Total	Pop Hits	Pop Total	Fold Enrichment	Bonferroni	Benjamini	FDR
KEGG_PATHWAY	ath01210:2-Oxocarboxylic acid metabolism	9	1.59574	5.78901e-05	IMS2, CYP83A1, BCAT4, CYP79F2, IMD1, AK3, IPMI2, IPMI1, MAM1	89	74	4727	6.45961	0.00358286	0.00358286	0.0584044
KEGG_PATHWAY	ath00710:Carbon fixation in photosynthetic organisms	8	1.41844	0.000257872	PMDH2, GAPB, GAPA-2, RBCS1A, SBPASE, FBA2, RPI2, PRK	89	69	4727	6.15795	0.015863	0.00796319	0.259927
KEGG_PATHWAY	ath00966:Glucosinolate biosynthesis	4	0.70922	0.00121478	IMS2, CYP83A1, CYP79F2, MAM1	89	12	4727	17.7041	0.0725923	0.0248078	1.21915
KEGG_PATHWAY	ath00480:Glutathione metabolism	7	1.24113	0.00732022	ERD9, GSTF11, GSTU24, ATGSTF13, GSTF8, GSTU25, GSTU18	89	93	4727	3.9977	0.365884	0.107636	7.14617
KEGG_PATHWAY	ath00196:Photosynthesis - antenna proteins	4	0.70922	0.00743365	LHCA6, CAB2, CAB3, LHB1B1	89	22	4727	9.65679	0.370361	0.0883705	7.2532
KEGG_PATHWAY	ath00290:Valine, leucine and isoleucine biosynthesis	4	0.70922	0.00843504	BCAT4, IMD1, IPMI2, IPMI1	89	23	4727	9.23693	0.408557	0.0838102	8.19315
KEGG_PATHWAY	ath00660:C5-Branched dibasic acid metabolism	3	0.531915	0.0139935	IMD1, IPMI2, IPMI1	89	10	4727	15.9337	0.582606	0.117342	13.2563
KEGG_PATHWAY	ath04075:Plant hormone signal transduction	11	1.95035	0.0243573	AHP4, PP2CA, ERF2, AT3G12830, AT3G09870, GH3.1, AT1G79130, ABI2, ABI1, AT1G56150, HAI3	89	265	4727	2.20466	0.783215	0.173955	22.0299
KEGG_PATHWAY	ath04931:Insulin resistance	4	0.70922	0.0307198	PP2CA, ABI2, ABI1, HAI3	89	37	4727	5.74188	0.855503	0.193414	27.0117
KEGG_PATHWAY	ath01100:Metabolic pathways	44	7.80142	0.0332409	LOX2, AT1G22100, IPMI2, RPI2, IPMI1, TAA1, ELI3-1, GDCH, CAD9, AOS, NPQ4, SQP1, GAPA-2, CAB2, CAB3, RBCS1A, FBA2, NCED3, IPT5, PRK, SDH2-3, AT5G40150, AT2G29290, PMDH2, CORI3, YUC5, YUC4, AK3, IMD1, AT5G19730, AT5G51890, ACS6, LHB1B1, AT2G41480, BCAT4, GAPB, AT4G13180, BUD2, SBPASE, AT5G15950, PSAK, RPB5C, GAE1, AOC3	89	1833	4727	1.27493	0.877049	0.189089	28.905
KEGG_PATHWAY	ath00270:Cysteine and methionine metabolism	6	1.06383	0.0363587	PMDH2, CORI3, BUD2, AK3, AT5G15950, ACS6	89	99	4727	3.21893	0.899364	0.188401	31.1851
KEGG_PATHWAY	ath01110:Biosynthesis of secondary metabolites	27	4.78723	0.0473909	LOX2, IPMI2, IPMI1, RPI2, ELI3-1, GDCH, CAD9, AOS, CYP83A1, SQP1, FBA2, NCED3, IPT5, MAM1, SDH2-3, AT2G29290, PMDH2, AT5G40150, CORI3, IMD1, AK3, AT5G51890, ACS6, AT2G41480, BCAT4, GA3OX2, AOC3	89	1019	4727	1.4073	0.950715	0.221857	38.7342

## Sheet: 2. Day 0_BTH (Down)
Category	Term	Count	%	PValue	Genes	List Total	Pop Hits	Pop Total	Fold Enrichment	Bonferroni	Benjamini	FDR
KEGG_PATHWAY	ath03008:Ribosome biogenesis in eukaryotes	17	1.43218	3.66499e-07	AT2G21440, AT1G10300, AT1G06720, SDN2, SDN3, AT3G05060, AT5G38720, AT1G43860, AT5G08600, AT5G27120, AT5G66540, AT5G37350, AT2G27200, AT4G02400, AT3G12860, XRN2, AT2G24990	169	101	4727	4.70789	2.9686e-05	2.9686e-05	0.000390589
KEGG_PATHWAY	ath04712:Circadian rhythm - plant	6	0.505476	0.00824422	PRR7, PRR5, FKF1, ELF3, GI, PRR9	169	36	4727	4.66174	0.488573	0.284858	8.44456
KEGG_PATHWAY	ath03040:Spliceosome	14	1.17944	0.018255	SMP2, SMP1, CDC5, AT1G28060, AT2G40650, AT4G21660, AT2G16860, EMB3011, ESP3, DOT2, PRP40A, PRP40B, AT1G60200, THO2	169	192	4727	2.03951	0.77515	0.391915	17.8273
KEGG_PATHWAY	ath00380:Tryptophan metabolism	6	0.505476	0.0225703	BGLU35, AT5G65750, TGG2, ALDH3I1, TGG1, BGLU34	169	46	4727	3.64831	0.842628	0.370157	21.596
KEGG_PATHWAY	ath00500:Starch and sucrose metabolism	10	0.84246	0.032831	AT3G59480, BGLU17, BGLU44, ATHXK4, SPS2F, SPS3F, SUS1, PHS2, SUS6, ATTPS6	169	125	4727	2.23763	0.933059	0.417711	29.9361
KEGG_PATHWAY	ath04075:Plant hormone signal transduction	16	1.34794	0.0482095	RR3, PIF4, AT5G51470, RCAR1, ABF1, IAA1, SHY2, IAA2, SNRK2.7, ABI5, PYL10, OST1, PYL7, HAB1, ATAUX2-11, ARR9	169	265	4727	1.68878	0.981725	0.486774	40.9379
KEGG_PATHWAY	ath00280:Valine, leucine and isoleucine degradation	5	0.42123	0.0742717	LINC4, ALDH3I1, MCCA, BCAT-2, BCAT-1	169	45	4727	3.10782	0.998072	0.590582	56.0657

## Sheet: 3. Day 0_Both (Down)
Category	Term	Count	%	PValue	Genes	List Total	Pop Hits	Pop Total	Fold Enrichment	Bonferroni	Benjamini	FDR
KEGG_PATHWAY	ath04075:Plant hormone signal transduction	4	5.12821	0.0155756	AT1G48660, ABF3, HAI2, HAI1	11	265	4727	6.48645	0.14528	0.14528	8.99563
KEGG_PATHWAY	ath04931:Insulin resistance	2	2.5641	0.075643	HAI2, HAI1	11	37	4727	23.2285	0.544595	0.325163	37.644

## Sheet: 4. Day 0_10 kHZ (Up)
Category	Term	Count	%	PValue	Genes	List Total	Pop Hits	Pop Total	Fold Enrichment	Bonferroni	Benjamini	FDR
KEGG_PATHWAY	ath01110:Biosynthesis of secondary metabolites	31	5.29915	0.0028598	AT5G64100, THA1, LINC4, PLA2-ALPHA, AT4G37520, LUP1, LUT1, ALD1, CSY5, BGLU17, ADH1, AGT, CYP90D1, AT3G01190, ERD5, G6PD3, G6PD4, KCS12, BGLU45, PDC2, HPT1, ASN1, AT4G37530, PYD4, PCK2, CYP735A2, AT1G80380, CCR2, BCAT-2, AT1G21400, CCOAMT	87	1019	4727	1.65293	0.176955	0.176955	2.90331
KEGG_PATHWAY	ath04712:Circadian rhythm - plant	5	0.854701	0.00385986	PRR7, PRR5, FKF1, PRR3, TOC1	87	36	4727	7.5463	0.231241	0.123211	3.90049
KEGG_PATHWAY	ath00940:Phenylpropanoid biosynthesis	9	1.53846	0.00730019	AT5G64100, BGLU17, BGLU45, CCR2, AT4G37520, AT4G37530, ALDH2C4, CCOAMT, AT3G01190	87	157	4727	3.11465	0.392397	0.15302	7.2607
KEGG_PATHWAY	ath00250:Alanine, aspartate and glutamate metabolism	4	0.683761	0.055955	AGT, ALAAT2, ASN1, PYD4	87	48	4727	4.52778	0.98007	0.62427	44.6992
KEGG_PATHWAY	ath04626:Plant-pathogen interaction	7	1.19658	0.0683159	AT4G11230, AT3G47480, WRKY29, RPM1, RBOHA, CNGC13, CPK23	87	159	4727	2.39203	0.991867	0.618008	51.7114

## Sheet: 5. Day 0_BTH (Up)
Category	Term	Count	%	PValue	Genes	List Total	Pop Hits	Pop Total	Fold Enrichment	Bonferroni	Benjamini	FDR
KEGG_PATHWAY	ath00966:Glucosinolate biosynthesis	10	0.896861	1.16602e-10	IMS2, UGT74B1, CYP83A1, SOT16, CYP79F2, CYP79B2, SUR1, CYP83B1, CYP79B3, MAM1	212	12	4727	18.581	1.10772e-08	1.10772e-08	1.28169e-07
KEGG_PATHWAY	ath01210:2-Oxocarboxylic acid metabolism	19	1.70404	1.90831e-09	UGT74B1, ASP4, CYP83B1, IMD1, AK3, IPMI2, IPMI1, VAT1, IMS2, CYP83A1, BCAT4, SOT16, CYP79F2, SUR1, CYP79B2, IIL1, CYP79B3, NAGS2, MAM1	212	74	4727	5.72495	1.8129e-07	9.06449e-08	2.09763e-06
KEGG_PATHWAY	ath01110:Biosynthesis of secondary metabolites	83	7.44395	3.82796e-09	GPAT7, AT5G19890, GPAT5, AT5G06730, LOX3, CYP83B1, IPMI2, IPMI1, TSB2, AT4G17260, PGL4, SOT16, AT4G18440, CYP79B2, SUR1, AT5G14130, ASA1, CYP79B3, AT1G49570, MTO1, MAM1, UGT74B1, AT5G19880, ASP4, AT2G04400, ACS1, IMD1, TSA1, PSD2, PGL5, ACS6, VAT1, BGLU22, BGLU24, AT2G41480, HMT3, BCAT4, VTC5, ASB1, IIL1, GA3OX2, MS2, NAGS2, AOC4, AOC3, ADT4, GGPS6, AT2G18620, ADT5, AT4G22110, ADT6, BGLU11, AT3G2…	212	1019	4727	1.81616	3.63656e-07	1.21219e-07	4.20771e-06
KEGG_PATHWAY	ath01230:Biosynthesis of amino acids	26	2.33184	0.000129159	ADT4, ADT5, ADT6, IPMI2, TSB2, IPMI1, CM1, ASA1, AT4G28410, MTO1, PSAT, ASP4, AT2G04400, IMD1, AK3, TSA1, SAM1, VAT1, BCAT4, ASB1, IIL1, OASC, MAT3, RSW10, MS2, NAGS2	212	254	4727	2.28239	0.0121959	0.00306302	0.141881
KEGG_PATHWAY	ath00380:Tryptophan metabolism	10	0.896861	0.000154516	CYP71A13, UGT74B1, SOT16, NIT1, NIT2, NIT3, CYP79B2, SUR1, CYP83B1, CYP79B3	212	46	4727	4.84721	0.0145729	0.00293172	0.169713
KEGG_PATHWAY	ath00400:Phenylalanine, tyrosine and tryptophan biosynthesis	11	0.986547	0.000173499	ADT4, ASP4, ADT5, AT2G04400, ADT6, ASB1, TSA1, ASA1, TSB2, AT4G28410, CM1	212	57	4727	4.30296	0.0163487	0.00274353	0.190545
KEGG_PATHWAY	ath00940:Phenylpropanoid biosynthesis	18	1.61435	0.00054834	BGLU42, AT5G19890, AT5G19880, UGT72E1, AT5G06730, PAL3, BGLU11, AT3G21770, AT3G47050, BGLU22, AT3G47040, BGLU24, AT2G38390, AT2G41480, AT1G44970, AT5G14130, AT1G49570, AT5G66390	212	157	4727	2.55636	0.0507723	0.00741616	0.601089
KEGG_PATHWAY	ath00660:C5-Branched dibasic acid metabolism	5	0.44843	0.000655324	IMD1, IIL1, IPMI2, IPMI1, VAT1	212	10	4727	11.1486	0.0603766	0.0077543	0.717981
KEGG_PATHWAY	ath00270:Cysteine and methionine metabolism	13	1.16592	0.00136281	AT4G17260, HMT3, ASP4, ACS1, AK3, MAT3, OASC, AT4G28410, SAM1, MEE57, MS2, ACS6, MTO1	212	99	4727	2.92791	0.121514	0.0142919	1.48785
KEGG_PATHWAY	ath00920:Sulfur metabolism	8	0.717489	0.00145035	APS3, AKN2, APS1, APK, AT5G09290, SAL1, OASC, MTO1	212	39	4727	4.57378	0.128799	0.0136937	1.58273
KEGG_PATHWAY	ath01100:Metabolic pathways	103	9.23767	0.00241667	GPAT7, AT5G19890, GPAT5, LOX3, PLC5, IPMI2, IPMI1, AT1G24320, AT4G17260, PGL4, AKN2, AT2G30660, AT4G18440, PMEPCRA, AT5G14130, ASA1, AT1G49570, ATBETAFRUCT4, MTO1, AT5G19880, ASP4, AT2G04400, ACS1, PSD2, MEE57, ACS6, PGL5, BGLU22, BGLU24, BCAT4, VTC5, AT2G30650, ASB1, TSO2, NAGS2, AT5G51830, ADT4, AT2G07751, AT2G18620, ADT5, ADT6, BGLU11, PME3, CM1, OPCL1, AT1G79470, NCED5, AK3, PAL3, AT2G38390, …	212	1833	4727	1.25292	0.205356	0.0206797	2.62457
KEGG_PATHWAY	ath00480:Glutathione metabolism	12	1.07623	0.00261731	GSTU20, GSTF11, GSTL1, GSTU5, GSTF8, GSTU6, GSTU21, GSTF9, GSTU27, GSTU3, TSO2, GSTU19	212	93	4727	2.87705	0.220397	0.0205338	2.83963
KEGG_PATHWAY	ath00290:Valine, leucine and isoleucine biosynthesis	6	0.538117	0.00294123	BCAT4, IMD1, IIL1, IPMI2, IPMI1, VAT1	212	23	4727	5.81665	0.244087	0.0212952	3.18592
KEGG_PATHWAY	ath00592:alpha-Linolenic acid metabolism	7	0.627803	0.00466414	OPR1, OPR3, LOX3, AOC4, AOS, OPCL1, AOC3	212	36	4727	4.33556	0.358618	0.0312256	5.00903
KEGG_PATHWAY	ath00460:Cyanoamino acid metabolism	9	0.807175	0.00476305	BGLU42, BGLU24, NIT1, NIT2, NIT3, BGLU11, AT3G47050, BGLU22, AT3G47040	212	60	4727	3.34458	0.364644	0.0297854	5.11274
KEGG_PATHWAY	ath00073:Cutin, suberine and wax biosynthesis	5	0.44843	0.030227	CYP86B1, AT5G08250, CYP86A1, MS2, CYP86A8	212	27	4727	4.12911	0.945842	0.1666	28.6364
KEGG_PATHWAY	ath00450:Selenocompound metabolism	4	0.358744	0.0436025	APS3, APS1, MS2, MTO1	212	18	4727	4.95493	0.985524	0.220523	38.74
KEGG_PATHWAY	ath04075:Plant hormone signal transduction	19	1.70404	0.0474187	ERF1, AXR3, ERF2, AT4G22620, AT5G50760, LAX3, AT3G51200, NPR3, AT1G56150, AT5G13370, PYL1, JAZ5, JAZ6, JAZ3, TIFY10B, IAA18, AT1G16510, GH3.3, TIFY7	212	265	4727	1.59867	0.990099	0.226162	41.374
KEGG_PATHWAY	ath04626:Plant-pathogen interaction	13	1.16592	0.0505851	MSS3, HCD1, AT1G18210, MEK1, AT2G41410, AT3G59440, RBOHD, CML43, AT3G25600, CML37, TCH2, CNGC19, AT3G10300	212	159	4727	1.82304	0.992784	0.228599	43.4808

## Sheet: 6. Day 0_Both (Up)
Category	Term	Count	%	PValue	Genes	List Total	Pop Hits	Pop Total	Fold Enrichment	Bonferroni	Benjamini	FDR
KEGG_PATHWAY	ath00910:Nitrogen metabolism	4	1.76211	0.00410874	NRT2.5, NRT2.6, NRT2:1, NIA1	38	42	4727	11.8471	0.130629	0.130629	3.55594
KEGG_PATHWAY	ath04075:Plant hormone signal transduction	7	3.0837	0.0157026	JAZ10, PYL4, PYL6, JAZ4, PYL5, ARR4, AT2G36210	38	265	4727	3.2859	0.416159	0.235905	12.9934
KEGG_PATHWAY	ath04626:Plant-pathogen interaction	5	2.20264	0.0343696	CPK27, TCH3, AT4G25090, CNGC12, CPK22	38	159	4727	3.91178	0.695511	0.327245	26.4765

## Sheet: 7. Day 1_10 kHZ (Down)
Category	Term	Count	%	PValue	Genes	List Total	Pop Hits	Pop Total	Fold Enrichment	Bonferroni	Benjamini	FDR
KEGG_PATHWAY	ath04141:Protein processing in endoplasmic reticulum	13	3.50404	1.45985e-06	AT5G37670, AT5G51440, UBC8, AT1G02620, DER2.1, HSP90.1, RMA1, HSP70, RMA3, RMA2, SCY1, AT1G59860, FES1A	50	219	4727	5.61196	5.9852e-05	5.9852e-05	0.00134344

## Sheet: 8. Day 1_BTH (Down)
Category	Term	Count	%	PValue	Genes	List Total	Pop Hits	Pop Total	Fold Enrichment	Bonferroni	Benjamini	FDR
KEGG_PATHWAY	ath01110:Biosynthesis of secondary metabolites	61	6.25641	2.68702e-08	THA1, CAT1, AT5G17820, AT3G29430, AT4G37520, DIN4, AT2G23400, GPAT3, AT4G26770, CHLM, BCCP2, AT1G49570, AGT2, ACS9, BCE2, AT2G37130, ALDH3I1, PDC2, AT5G51890, BGLU21, AT3G49160, PDC3, PLDALPHA3, AT5G04120, NPC2, AT4G16270, APL4, FAH1, AT1G71695, G6PD1, CYSD2, AT2G39040, AT5G28237, AT1G34510, LPAT3, BGLU17, IPT3, AT5G24070, SMT3, NCED2, AT2G34060, AT1G77330, PEN1, IPT5, BAN, AT3G49960, BR6OX1, AT4…	145	1019	4727	1.95152	2.3377e-06	2.3377e-06	2.90402e-05
KEGG_PATHWAY	ath00940:Phenylpropanoid biosynthesis	19	1.94872	9.07243e-07	AT4G11290, AT3G49960, AT2G39040, AT2G37130, AT5G17820, AT4G37520, AT5G51890, BGLU21, RHS18, AT1G34510, BGLU17, AT4G16270, AT5G24070, AT1G49570, AT2G34060, SNG1, FAH1, BGLU46, AT1G71695	145	157	4727	3.94522	7.8927e-05	3.94643e-05	0.000980507
KEGG_PATHWAY	ath00480:Glutathione metabolism	11	1.12821	0.000467255	GSTU24, ATGSTF13, GSTU14, GSTU28, GSTU25, GSTF4, GSTU26, GSTU18, APX5, TAPX, G6PD1	145	93	4727	3.85591	0.0398451	0.0134621	0.503835
KEGG_PATHWAY	ath01100:Metabolic pathways	76	7.79487	0.000683826	THA1, AT5G17820, AT3G29430, AT4G37520, DIN4, GPAT3, PPL1, CHLM, AT4G26770, BCCP2, AT1G49570, AT5G51490, ACS9, AGT2, BCE2, LHCB4.3, AT2G37130, BGAL2, AT5G04970, ALDH3I1, PDC2, AT5G51890, BGLU21, AT3G49160, PDC3, PLDALPHA3, FDH, AT5G04120, NPC2, AT5G51500, PSAD-2, AT4G16270, APL4, FAH1, AT1G71695, SUS6, G6PD1, SUS5, GMD1, GDH1, GDH2, CYSD2, AT2G39040, AT4G17470, ATPC1, PME2, AT5G28237, AT5G21100, A…	145	1833	4727	1.35166	0.0577769	0.0147682	0.736578
KEGG_PATHWAY	ath00040:Pentose and glucuronate interconversions	7	0.717949	0.0274134	AT3G24670, AT5G57655, AT5G51500, AT5G04970, PME2, AT3G07010, AT5G51490	145	76	4727	3.00263	0.910924	0.383473	25.9485
KEGG_PATHWAY	ath00053:Ascorbate and aldarate metabolism	5	0.512821	0.0349657	MIOX2, ALDH3I1, AT5G21100, APX5, TAPX	145	41	4727	3.97561	0.954792	0.403144	31.9318
KEGG_PATHWAY	ath00250:Alanine, aspartate and glutamate metabolism	5	0.512821	0.057166	GDH1, AGT2, GDH2, ASN1, PYD4	145	48	4727	3.39583	0.994032	0.518866	47.0695

## Sheet: 9. Day 1_Both (Down)
Category	Term	Count	%	PValue	Genes	List Total	Pop Hits	Pop Total	Fold Enrichment	Bonferroni	Benjamini	FDR
KEGG_PATHWAY	ath04141:Protein processing in endoplasmic reticulum	13	5.77778	4.80946e-08	HSP17.6A, AT1G54050, HSP17.6II, HSP23.6-MITO, AT1G07400, HSP21, AT2G29500, HSP70B, HSP17.4, AT1G52560, HSP18.2, ATHSP22.0, AT1G53540	38	219	4727	7.38416	1.68331e-06	1.68331e-06	4.26003e-05
KEGG_PATHWAY	ath00940:Phenylpropanoid biosynthesis	6	2.66667	0.00699791	AT5G64100, AT4G30170, AT4G26010, AT2G18980, AT5G15180, AT3G01190	38	157	4727	4.75394	0.217912	0.115643	6.03076
KEGG_PATHWAY	ath00520:Amino sugar and nucleotide sugar metabolism	4	1.77778	0.0875985	UGE1, AT3G59480, ASD1, UGE3	38	135	4727	3.68577	0.959588	0.656835	55.6041

## Sheet: 10. Day 1_10 kHZ (Up)
Category	Term	Count	%	PValue	Genes	List Total	Pop Hits	Pop Total	Fold Enrichment	Bonferroni	Benjamini	FDR
KEGG_PATHWAY	ath00966:Glucosinolate biosynthesis	6	1.9544	1.09113e-07	UGT74B1, CYP83A1, CYP79F2, SUR1, CYP79B2, MAM1	54	12	4727	43.7685	5.45561e-06	5.45561e-06	0.000105091
KEGG_PATHWAY	ath01210:2-Oxocarboxylic acid metabolism	9	2.9316	1.23745e-06	UGT74B1, CYP83A1, CYP79F2, SUR1, CYP79B2, IIL1, IPMI2, IPMI1, MAM1	54	74	4727	10.6464	6.18704e-05	3.09357e-05	0.00119183
KEGG_PATHWAY	ath01110:Biosynthesis of secondary metabolites	24	7.81759	0.00027761	UGT74B1, G6PD3, BGLU42, PMDH2, MES16, AT5G06730, AT2G18620, BGLU40, AT3G01260, CYP735A1, IPMI2, IPMI1, TT5, CYP83A1, IPT3, HMT3, NPC6, SUR1, CYP79B2, IIL1, BGLU47, PA2, CYP90D1, MAM1	54	1019	4727	2.06172	0.0137865	0.00461679	0.267058
KEGG_PATHWAY	ath00908:Zeatin biosynthesis	4	1.30293	0.00132619	CKX3, CKX1, IPT3, CYP735A1	54	20	4727	17.5074	0.0642002	0.0164516	1.27003
KEGG_PATHWAY	ath00660:C5-Branched dibasic acid metabolism	3	0.977199	0.00524068	IIL1, IPMI2, IPMI1	54	10	4727	26.2611	0.231045	0.051188	4.93487
KEGG_PATHWAY	ath00380:Tryptophan metabolism	4	1.30293	0.0143882	UGT74B1, YUC6, SUR1, CYP79B2	54	46	4727	7.61192	0.5155	0.113765	13.0282
KEGG_PATHWAY	ath00290:Valine, leucine and isoleucine biosynthesis	3	0.977199	0.0268509	IIL1, IPMI2, IPMI1	54	23	4727	11.4179	0.74357	0.176683	23.0603
KEGG_PATHWAY	ath01100:Metabolic pathways	27	8.79479	0.0814726	NF-YB11, AT5G06730, AT2G18620, IPMI2, IPMI1, FNR2, AKN2, IPT3, CSLD5, ATPMEPCRB, CWINV5, PA2, CYP90D1, RFNR2, BGLU42, G6PD3, PMDH2, YUC6, BGLU40, CYP735A1, AT3G01260, TT5, HMT3, AT3G13940, NPC6, IIL1, BGLU47	54	1833	4727	1.28942	0.985724	0.41207	55.8912
KEGG_PATHWAY	ath00480:Glutathione metabolism	4	1.30293	0.0854374	G6PD3, GSTF11, GSTU6, GSTU25	54	93	4727	3.76503	0.988501	0.391138	57.6912
KEGG_PATHWAY	ath00940:Phenylpropanoid biosynthesis	5	1.62866	0.0979946	BGLU42, AT5G06730, BGLU40, BGLU47, PA2	54	157	4727	2.7878	0.99424	0.402902	62.966

[truncated: 7 more sheets: 11. Day 1_BTH (Up), 12. Day 1_Both (Up), 13. Day 2_10 kHZ (Down), 14. Day 2_BTH (Down), 15. Day 2_10 kHz (Up), 16. Day 2_BTH (Up), 17. Day 2_Both (Up)]
